# Supplementary material for: Active versus passive distraction for reducing procedural pain and anxiety in children: a meta-analysis and systematic review
Source: Springer Nature journal article supplement (doi:10.1186/s13052-023-01518-4), 2023-08-31
Supplement: MOESM2 [file 25986990]

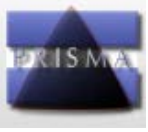

## PRISMA 2009 Flow Diagram

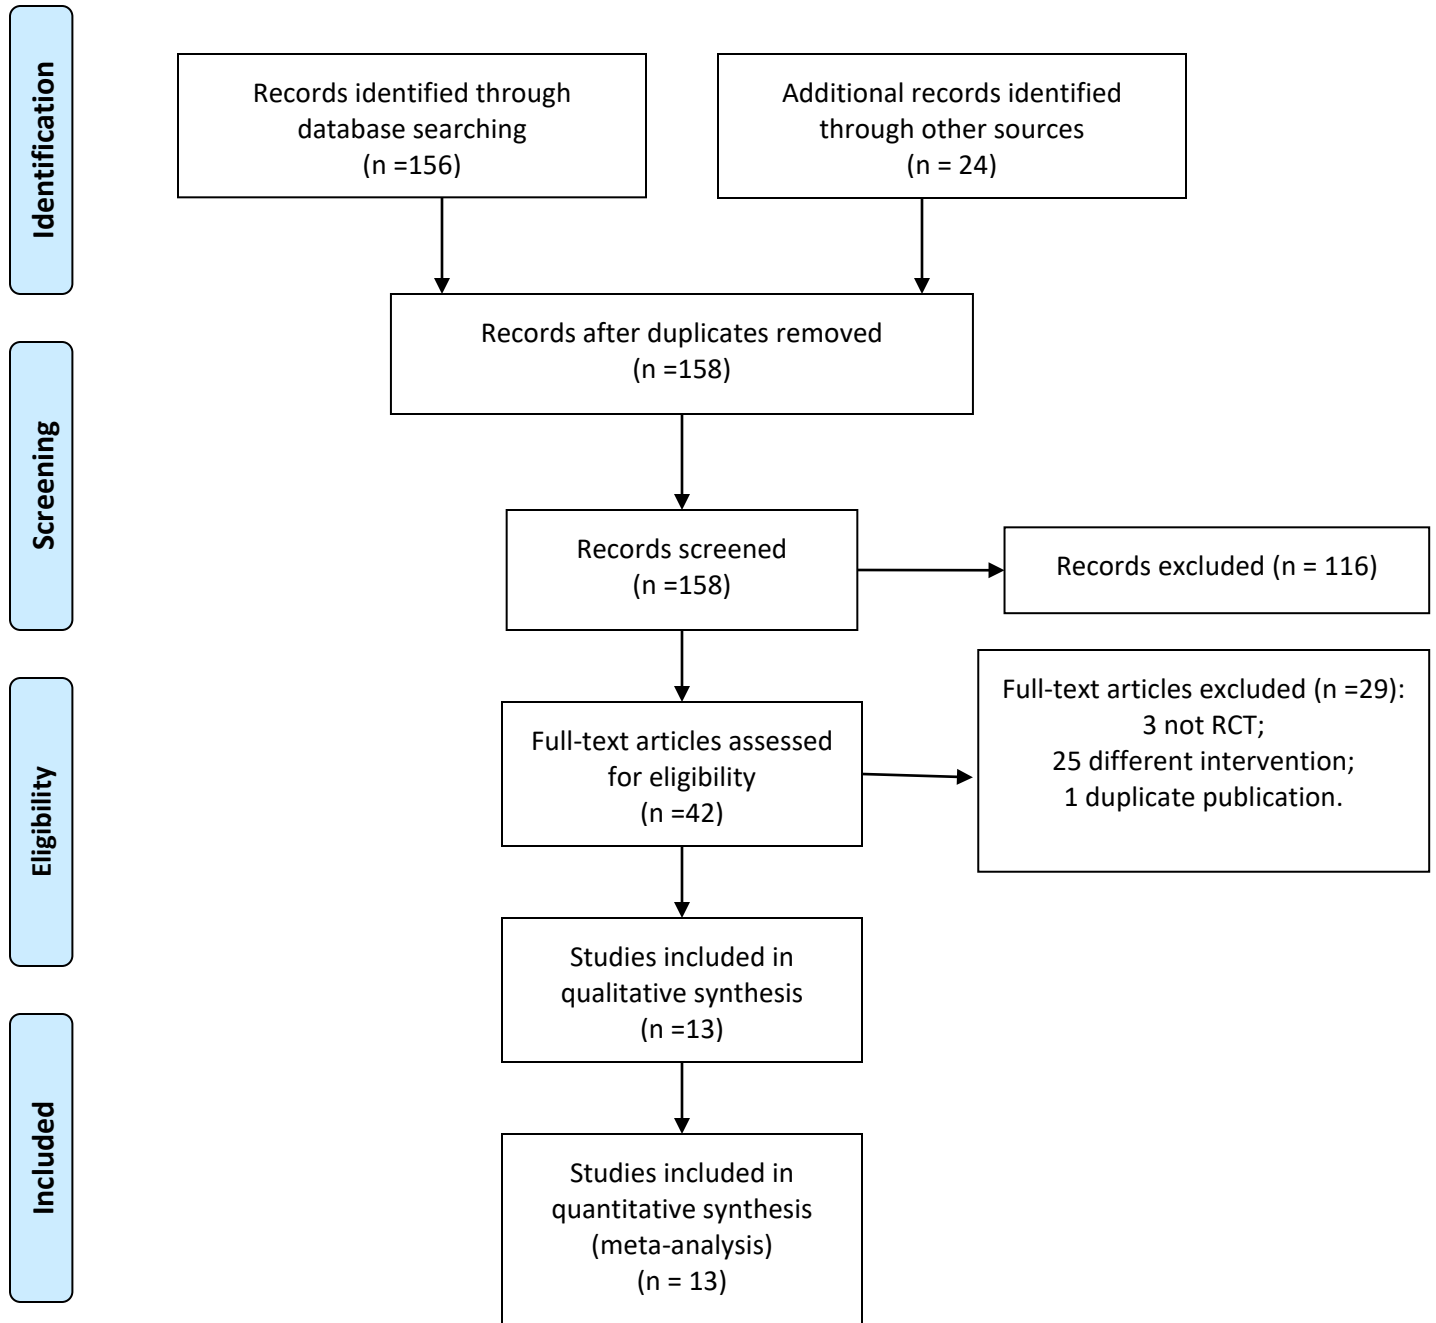

From: Moher D, Liberati A, Tetzlaff J, Altman DG, The PRISMA Group (2009). Preferred Reporting Items for Systematic Reviews and Meta-Analyses: The PRISMA Statement. PLoS Med 6(7): e1000097. doi:10.1371/journal.pmed1000097

For more information, visit [www.prisma-statement.org](http://www.prisma-statement.org).
